# Supplementary material for: A worldwide event-based debris flow barrier dam dataset from 1800 to 2023
Source: Copernicus journal article supplement (doi:10.5194/essd-17-1573-2025), 2025-04-15
Supplement: Supplementary file 1 [file essd-17-1573-2025-supplement.zip]

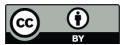

## *Supplement of*

# **A worldwide event-based debris flow barrier dam dataset from 1800 to 2023**

**Haiguang Cheng et al.**

*Correspondence to:* Kaiheng Hu (khhu@imde.ac.cn)

- [essd-17-1573-2025-supplement-title-page.pdf](#)
- 10-Zhouqu-Debris flow channel.kmz
- 10-Zhouqu-Debris flow gully basin.kmz
- 10-Zhouqu.kmz
- 104-Tianshui-Debris flow channel.kmz
- 104-Tianshui-Debris flow gully basin.kmz
- 104-Tianshui.kmz
- 11-Zhinaxiang-Debris flow channel.kmz
- 11-Zhinaxiang-Debris flow gully basin.kmz
- 11-Zhinaxiang.kmz
- 110-Tha Di River-Debris flow channel.kmz
- 110-Tha Di River-Debris flow gully basin.kmz
- 110-Tha Di River.kmz
- 111-Terrarossa-Debris flow channel.kmz
- 111-Terrarossa-Debris flow gully basin.kmz
- 111-Terrarossa.kmz
- 112-Tegermach River (Lake Yashinkul)-Debris flow channel.kmz
- 112-Tegermach River (Lake Yashinkul)-Debris flow gully basin.kmz
- 112-Tegermach River (Lake Yashinkul).kmz
- 113-Teculcheya River-Debris flow channel.kmz

- 113-Teculcheya River-Debris flow gully basin.kmz
- 113-Teculcheya River.kmz
- 114-Tatopani-Debris flow channel.kmz
- 114-Tatopani-Debris flow gully basin.kmz
- 114-Tatopani.kmz
- 115-Tateyama · Tombire (Yukawa · Dorogoiike)-Debris flow channel.kmz
- 115-Tateyama · Tombire (Yukawa · Dorogoiike)-Debris flow gully basin.kmz
- 115-Tateyama · Tombire (Yukawa · Dorogoiike).kmz
- 116-Tateyama · Tombire (Yukawa · Dorogoiike)-Debris flow channel.kmz
- 116-Tateyama · Tombire (Yukawa · Dorogoiike)-Debris flow gully basin.kmz
- 116-Tateyama · Tombire (Yukawa · Dorogoiike).kmz
- 117-Tassinaro-Debris flow channel.kmz
- 117-Tassinaro-Debris flow gully basin.kmz
- 117-Tassinaro.kmz
- 118-Taoling-Debris flow channel.kmz
- 118-Taoling-Debris flow gully basin.kmz
- 118-Taoling.kmz
- 119-Taoling-Debris flow channel.kmz
- 119-Taoling-Debris flow gully basin.kmz
- 119-Taoling.kmz
- 120-Taoling-Debris flow channel.kmz
- 120-Taoling-Debris flow gully basin.kmz
- 120-Taoling.kmz
- 121-Taoling-Debris flow channel.kmz
- 121-Taoling-Debris flow gully basin.kmz
- 121-Taoling.kmz
- 125-Tang stream-Debris flow channel.kmz
- 125-Tang stream-Debris flow gully basin.kmz
- 125-Tang stream.kmz
- 126-Tanchang County-Debris flow channel.kmz
- 126-Tanchang County-Debris flow gully basin.kmz
- 126-Tanchang County.kmz
- 127-Tanchang County-Debris flow channel.kmz

- 127-Tanchang County-Debris flow gully basin.kmz
- 127-Tanchang County.kmz
- 130-Taidong-Debris flow channel.kmz
- 130-Taidong-Debris flow gully basin.kmz
- 130-Taidong.kmz
- 132-Taidong-Debris flow channel.kmz
- 132-Taidong-Debris flow gully basin.kmz
- 132-Taidong.kmz
- 133-Taidong-Debris flow channel.kmz
- 133-Taidong-Debris flow gully basin.kmz
- 133-Taidong.kmz
- 134-Taibei-Debris flow channel.kmz
- 134-Taibei-Debris flow gully basin.kmz
- 134-Taibei.kmz
- 138-Squamish River-Debris flow channel.kmz
- 138-Squamish River-Debris flow gully basin.kmz
- 138-Squamish River.kmz
- 139-Spanish Fork River-Debris flow channel.kmz
- 139-Spanish Fork River-Debris flow gully basin.kmz
- 139-Spanish Fork River.kmz
- 140-South Fork Smith River-Debris flow channel.kmz
- 140-South Fork Smith River-Debris flow gully basin.kmz
- 140-South Fork Smith River.kmz
- 141-South Fork Smith River-Debris flow channel.kmz
- 141-South Fork Smith River-Debris flow gully basin.kmz
- 141-South Fork Smith River.kmz
- 143-Solo River-Debris flow channel.kmz
- 143-Solo River-Debris flow gully basin.kmz
- 143-Solo River.kmz
- 144-Signatico-Debris flow channel.kmz
- 144-Signatico-Debris flow gully basin.kmz
- 144-Signatico.kmz
- 145-Signatico-Debris flow channel.kmz

- 145-Signatico-Debris flow gully basin.kmz
- 145-Signatico.kmz
- 146-Shuyexiang-Debris flow channel.kmz
- 146-Shuyexiang-Debris flow gully basin.kmz
- 146-Shuyexiang.kmz
- 154-Shaohuopingsuidao-Debris flow channel.kmz
- 154-Shaohuopingsuidao-Debris flow gully basin.kmz
- 154-Shaohuopingsuidao.kmz
- 158-Sedongpugou-Debris flow channel.kmz
- 158-Sedongpugou-Debris flow gully basin.kmz
- 158-Sedongpugou.kmz
- 159-Sedongpugou-Debris flow channel.kmz
- 159-Sedongpugou-Debris flow gully basin.kmz
- 159-Sedongpugou.kmz
- 160-Sedongpugou-Debris flow channel.kmz
- 160-Sedongpugou-Debris flow gully basin.kmz
- 160-Sedongpugou.kmz
- 161-Sedongpugou-Debris flow channel.kmz
- 161-Sedongpugou-Debris flow gully basin.kmz
- 161-Sedongpugou.kmz
- 162-Sedongpugou-Debris flow channel.kmz
- 162-Sedongpugou-Debris flow gully basin.kmz
- 162-Sedongpugou.kmz
- 163-Sedongpugou-Debris flow channel.kmz
- 163-Sedongpugou-Debris flow gully basin.kmz
- 163-Sedongpugou.kmz
- 164-Sedongpugou-Debris flow channel.kmz
- 164-Sedongpugou-Debris flow gully basin.kmz
- 164-Sedongpugou.kmz
- 165-Sedongpugou-Debris flow channel.kmz
- 165-Sedongpugou-Debris flow gully basin.kmz
- 165-Sedongpugou.kmz
- 166-Schiazano-Debris flow channel.kmz

- 166-Schiazano-Debris flow gully basin.kmz
- 166-Schiazano.kmz
- 168-Santa River-Debris flow channel.kmz
- 168-Santa River-Debris flow gully basin.kmz
- 168-Santa River.kmz
- 169-Santa River-Debris flow channel.kmz
- 169-Santa River-Debris flow gully basin.kmz
- 169-Santa River.kmz
- 17-Zhajian-Debris flow channel.kmz
- 17-Zhajian-Debris flow gully basin.kmz
- 17-Zhajian.kmz
- 170-Santa River-Debris flow channel.kmz
- 170-Santa River-Debris flow gully basin.kmz
- 170-Santa River.kmz
- 171-Salzach River-Debris flow channel.kmz
- 171-Salzach River-Debris flow gully basin.kmz
- 171-Salzach River.kmz
- 172-S. Martino-Debris flow channel.kmz
- 172-S. Martino-Debris flow gully basin.kmz
- 172-S. Martino.kmz
- 174-Rotbach Torrent-Debris flow channel.kmz
- 174-Rotbach Torrent-Debris flow gully basin.kmz
- 174-Rotbach Torrent.kmz
- 175-Rosola-Debris flow channel.kmz
- 175-Rosola-Debris flow gully basin.kmz
- 175-Rosola.kmz
- 177-Rio Orli-Debris flow channel.kmz
- 177-Rio Orli-Debris flow gully basin.kmz
- 177-Rio Orli.kmz
- 178-Rio Brusago-Debris flow channel.kmz
- 178-Rio Brusago-Debris flow gully basin.kmz
- 178-Rio Brusago.kmz
- 179-Rhone River-Debris flow channel.kmz

- 179-Rhone River-Debris flow gully basin.kmz
- 179-Rhone River.kmz
- 180-Rhine River(upper)-Debris flow channel.kmz
- 180-Rhine River(upper)-Debris flow gully basin.kmz
- 180-Rhine River(upper).kmz
- 181-Rhine River(upper)-Debris flow channel.kmz
- 181-Rhine River(upper)-Debris flow gully basin.kmz
- 181-Rhine River(upper).kmz
- 185-Qingshuixi-Debris flow channel.kmz
- 185-Qingshuixi-Debris flow gully basin.kmz
- 185-Qingshuixi.kmz
- 186-Qingchuan-Debris flow channel.kmz
- 186-Qingchuan-Debris flow gully basin.kmz
- 186-Qingchuan.kmz
- 187-Qiaraigir Ravine-Debris flow channel.kmz
- 187-Qiaraigir Ravine-Debris flow gully basin.kmz
- 187-Qiaraigir Ravine.kmz
- 188-Qiaraigir Ravine-Debris flow channel.kmz
- 188-Qiaraigir Ravine-Debris flow gully basin.kmz
- 188-Qiaraigir Ravine.kmz
- 189-Qiaraigir Ravine-Debris flow channel.kmz
- 189-Qiaraigir Ravine-Debris flow gully basin.kmz
- 189-Qiaraigir Ravine.kmz
- 19-Yunyang-Debris flow channel.kmz
- 19-Yunyang-Debris flow gully basin.kmz
- 19-Yunyang.kmz
- 190-Qiaraigir Ravine-Debris flow channel.kmz
- 190-Qiaraigir Ravine-Debris flow gully basin.kmz
- 190-Qiaraigir Ravine.kmz
- 191-Qiaraigir Ravine-Debris flow channel.kmz
- 191-Qiaraigir Ravine-Debris flow gully basin.kmz
- 191-Qiaraigir Ravine.kmz
- 192-Qiaraigir Ravine-Debris flow channel.kmz

- 192-Qiaraigir Ravine-Debris flow gully basin.kmz
- 192-Qiaraigir Ravine.kmz
- 193-Danjuangou(Qiaojia)-Debris flow channel.kmz
- 193-Danjuangou(Qiaojia)-Debris flow gully basin.kmz
- 193-Danjuangou(Qiaojia).kmz
- 194-Qiaojia-Debris flow channel.kmz
- 194-Qiaojia-Debris flow gully basin.kmz
- 194-Qiaojia.kmz
- 196-Pubugou-Debris flow channel.kmz
- 196-Pubugou-Debris flow gully basin.kmz
- 196-Pubugou.kmz
- 197-Provo River-Debris flow channel.kmz
- 197-Provo River-Debris flow gully basin.kmz
- 197-Provo River.kmz
- 198-Provo River-Debris flow channel.kmz
- 198-Provo River-Debris flow gully basin.kmz
- 198-Provo River.kmz
- 199-Provo River-Debris flow channel.kmz
- 199-Provo River-Debris flow gully basin.kmz
- 199-Provo River.kmz
- 20-Yunling-Debris flow channel.kmz
- 20-Yunling-Debris flow gully basin.kmz
- 20-Yunling.kmz
- 200-Provo River-Debris flow channel.kmz
- 200-Provo River-Debris flow gully basin.kmz
- 200-Provo River.kmz
- 201-Poschiavino River-Debris flow channel.kmz
- 201-Poschiavino River-Debris flow gully basin.kmz
- 201-Poschiavino River.kmz
- 202-Portella del Lupo I-Debris flow channel.kmz
- 202-Portella del Lupo I-Debris flow gully basin.kmz
- 202-Portella del Lupo I.kmz
- 203-Pixcaya River-Debris flow channel.kmz

- 203-Pixcaya River-Debris flow gully basin.kmz
- 203-Pixcaya River.kmz
- 204-Pingshan-Debris flow channel.kmz
- 204-Pingshan-Debris flow gully basin.kmz
- 204-Pingshan.kmz
- 205-Pingdong-Debris flow channel.kmz
- 205-Pingdong-Debris flow gully basin.kmz
- 205-Pingdong.kmz
- 206-Pingdong-Debris flow channel.kmz
- 206-Pingdong-Debris flow gully basin.kmz
- 206-Pingdong.kmz
- 207-Pingdong-Debris flow channel.kmz
- 207-Pingdong-Debris flow gully basin.kmz
- 207-Pingdong.kmz
- 21-Yunling-Debris flow channel.kmz
- 21-Yunling-Debris flow gully basin.kmz
- 21-Yunling.kmz
- 213-Panzhou-Debris flow channel.kmz
- 213-Panzhou-Debris flow gully basin.kmz
- 213-Panzhou.kmz
- 214-Palongzangbu-Debris flow channel.kmz
- 214-Palongzangbu-Debris flow gully basin.kmz
- 214-Palongzangbu.kmz
- 215-Palongzangbu-Debris flow channel.kmz
- 215-Palongzangbu-Debris flow gully basin.kmz
- 215-Palongzangbu.kmz
- 216-Ottauqueche River tributary-Debris flow channel.kmz
- 216-Ottauqueche River tributary-Debris flow gully basin.kmz
- 216-Ottauqueche River tributary.kmz
- 217-Otaki River -Debris flow channel.kmz
- 217-Otaki River -Debris flow gully basin.kmz
- 217-Otaki River.kmz
- 218-Ossola-Debris flow channel.kmz



- 218-Ossola-Debris flow gully basin.kmz
- 218-Ossola.kmz
- 219-Odokoro River-Debris flow channel.kmz
- 219-Odokoro River-Debris flow gully basin.kmz
- 219-Odokoro River.kmz
- 22-Yunling-Debris flow channel.kmz
- 22-Yunling-Debris flow gully basin.kmz
- 22-Yunling.kmz
- 220-Odawara City · Soga Valley · Kenzawa-Debris flow channel.kmz
- 220-Odawara City · Soga Valley · Kenzawa-Debris flow gully basin.kmz
- 220-Odawara City · Soga Valley · Kenzawa.kmz
- 221-Niyang River-Debris flow channel.kmz
- 221-Niyang River-Debris flow gully basin.kmz
- 221-Niyang River.kmz
- 222-Niumiangou-Debris flow channel.kmz
- 222-Niumiangou-Debris flow gully basin.kmz
- 222-Niumiangou.kmz
- 223-Niumiangou-Debris flow channel.kmz
- 223-Niumiangou-Debris flow gully basin.kmz
- 223-Niumiangou.kmz
- 224-Niujuangou-Debris flow channel.kmz
- 224-Niujuangou-Debris flow gully basin.kmz
- 224-Niujuangou.kmz
- 225-Niujuangou-Debris flow channel.kmz
- 225-Niujuangou-Debris flow gully basin.kmz
- 225-Niujuangou.kmz
- 226-Niujuangou-Debris flow channel.kmz
- 226-Niujuangou-Debris flow gully basin.kmz
- 226-Niujuangou.kmz
- 227-Niujuangou-Debris flow channel.kmz
- 227-Niujuangou-Debris flow gully basin.kmz
- 227-Niujuangou.kmz
- 228-Nera River-Debris flow channel.kmz

- 228-Nera River-Debris flow gully basin.kmz
- 228-Nera River.kmz
- 229-Neijiang-Debris flow channel.kmz
- 229-Neijiang-Debris flow gully basin.kmz
- 229-Neijiang.kmz
- 23-Yunling-Debris flow channel.kmz
- 23-Yunling-Debris flow gully basin.kmz
- 23-Yunling.kmz
- 230-Nantou-Debris flow channel.kmz
- 230-Nantou-Debris flow gully basin.kmz
- 230-Nantou.kmz
- 231-Nantou-Debris flow channel.kmz
- 231-Nantou-Debris flow gully basin.kmz
- 231-Nantou.kmz
- 232-Nantou-Debris flow channel.kmz
- 232-Nantou-Debris flow gully basin.kmz
- 232-Nantou.kmz
- 233-Nantou-Debris flow channel.kmz
- 233-Nantou-Debris flow gully basin.kmz
- 233-Nantou.kmz
- 234-Nantou-Debris flow channel.kmz
- 234-Nantou-Debris flow gully basin.kmz
- 234-Nantou.kmz
- 235-Nantou-Debris flow channel.kmz
- 235-Nantou-Debris flow gully basin.kmz
- 235-Nantou.kmz
- 236-Nanjiang County-Debris flow channel.kmz
- 236-Nanjiang County-Debris flow gully basin.kmz
- 236-Nanjiang County.kmz
- 237-Nanguangou-Debris flow channel.kmz
- 237-Nanguangou-Debris flow gully basin.kmz
- 237-Nanguangou.kmz
- 239-Myagdi Valley, Nepal-Debris flow channel.kmz

- 239-Myagdi Valley, Nepal-Debris flow gully basin.kmz
- 239-Myagdi Valley, Nepal.kmz
- 24-Yunling-Debris flow channel.kmz
- 24-Yunling-Debris flow gully basin.kmz
- 24-Yunling.kmz
- 240-Muzuoxiang-Debris flow channel.kmz
- 240-Muzuoxiang-Debris flow gully basin.kmz
- 240-Muzuoxiang.kmz
- 241-Mur River-Debris flow channel.kmz
- 241-Mur River-Debris flow gully basin.kmz
- 241-Mur River.kmz
- 242-Mozigou-Debris flow channel.kmz
- 242-Mozigou-Debris flow gully basin.kmz
- 242-Mozigou.kmz
- 243-Mozigou-Debris flow channel.kmz
- 243-Mozigou-Debris flow gully basin.kmz
- 243-Mozigou.kmz
- 244-Mozigou-Debris flow channel.kmz
- 244-Mozigou-Debris flow gully basin.kmz
- 244-Mozigou.kmz
- 245-Moxi River-Debris flow channel.kmz
- 245-Moxi River-Debris flow gully basin.kmz
- 245-Moxi River.kmz
- 247-Moscardo-Debris flow channel.kmz
- 247-Moscardo-Debris flow gully basin.kmz
- 247-Moscardo.kmz
- 248-Moll River-Debris flow channel.kmz
- 248-Moll River-Debris flow gully basin.kmz
- 248-Moll River.kmz
- 249-Mohegou-Debris flow channel.kmz
- 249-Mohegou-Debris flow gully basin.kmz
- 249-Mohegou.kmz
- 25-Yuanguancun-Debris flow channel.kmz

- 25-Yuanguancun-Debris flow gully basin.kmz
- 25-Yuanguancun.kmz
- 254-Mingdonggou-Debris flow channel.kmz
- 254-Mingdonggou-Debris flow gully basin.kmz
- 254-Mingdonggou.kmz
- 257-Mianzhu-Debris flow channel.kmz
- 257-Mianzhu-Debris flow gully basin.kmz
- 257-Mianzhu.kmz
- 258-Mianzhu-Debris flow channel.kmz
- 258-Mianzhu-Debris flow gully basin.kmz
- 258-Mianzhu.kmz
- 259-Mianzhu-Debris flow channel.kmz
- 259-Mianzhu-Debris flow gully basin.kmz
- 259-Mianzhu.kmz
- 260-Mianxian-Debris flow channel.kmz
- 260-Mianxian-Debris flow gully basin.kmz
- 260-Mianxian.kmz
- 262-Meager Creek-Debris flow channel.kmz
- 262-Meager Creek-Debris flow gully basin.kmz
- 262-Meager Creek.kmz
- 263-Meager Creek-Debris flow channel.kmz
- 263-Meager Creek-Debris flow gully basin.kmz
- 263-Meager Creek.kmz
- 265-Mayangdiangou-Debris flow channel.kmz
- 265-Mayangdiangou-Debris flow gully basin.kmz
- 265-Mayangdiangou.kmz
- 266-Mattole River-Debris flow channel.kmz
- 266-Mattole River-Debris flow gully basin.kmz
- 266-Mattole River.kmz
- 268-Maoxian-Debris flow channel.kmz
- 268-Maoxian-Debris flow gully basin.kmz
- 268-Maoxian.kmz
- 27-Dayougou(Yongshan)-Debris flow channel.kmz

- 27-Dayougou(Yongshan)-Debris flow gully basin.kmz
- 27-Dayougou(Yongshan).kmz
- 270-Maoding River-Debris flow channel.kmz
- 270-Maoding River-Debris flow gully basin.kmz
- 270-Maoding River.kmz
- 271-Mantaro River-Debris flow channel.kmz
- 271-Mantaro River-Debris flow gully basin.kmz
- 271-Mantaro River.kmz
- 272-Mangkang-Debris flow channel.kmz
- 272-Mangkang-Debris flow gully basin.kmz
- 272-Mangkang.kmz
- 273-Managawa · Nishitani Village Nakajima-Debris flow channel.kmz
- 273-Managawa · Nishitani Village Nakajima-Debris flow gully basin.kmz
- 273-Managawa · Nishitani Village Nakajima.kmz
- 277-Luwanggou-Debris flow channel.kmz
- 277-Luwanggou-Debris flow gully basin.kmz
- 277-Luwanggou.kmz
- 278-Luquan-Debris flow channel.kmz
- 278-Luquan-Debris flow gully basin.kmz
- 278-Luquan.kmz
- 281-Lumanyima-Debris flow channel.kmz
- 281-Lumanyima-Debris flow gully basin.kmz
- 281-Lumanyima.kmz
- 282-Lugu iron mine-Debris flow channel.kmz
- 282-Lugu iron mine-Debris flow gully basin.kmz
- 282-Lugu iron mine.kmz
- 284-Longtanxiang-Debris flow channel.kmz
- 284-Longtanxiang-Debris flow gully basin.kmz
- 284-Longtanxiang.kmz
- 286-Longtan river-Debris flow channel.kmz
- 286-Longtan river-Debris flow gully basin.kmz
- 286-Longtan river.kmz
- 287-Longpoyima River-Debris flow channel.kmz

- 287-Longpoyima River-Debris flow gully basin.kmz
- 287-Longpoyima River.kmz
- 288-Longmengou-Debris flow channel.kmz
- 288-Longmengou-Debris flow gully basin.kmz
- 288-Longmengou.kmz
- 289-Longdagou-Debris flow channel.kmz
- 289-Longdagou-Debris flow gully basin.kmz
- 289-Longdagou.kmz
- 292-Linzhi-Debris flow channel.kmz
- 292-Linzhi-Debris flow gully basin.kmz
- 292-Linzhi.kmz
- 293-Linzhi-Debris flow channel.kmz
- 293-Linzhi-Debris flow gully basin.kmz
- 293-Linzhi.kmz
- 295-Lijiang-Debris flow channel.kmz
- 295-Lijiang-Debris flow gully basin.kmz
- 295-Lijiang.kmz
- 297-Leguluoduogou-Debris flow channel.kmz
- 297-Leguluoduogou-Debris flow gully basin.kmz
- 297-Leguluoduogou.kmz
- 298-Laurenzana-Debris flow channel.kmz
- 298-Laurenzana-Debris flow gully basin.kmz
- 298-Laurenzana.kmz
- 299-Laoyingzui(downstream)-Debris flow channel.kmz
- 299-Laoyingzui(downstream)-Debris flow gully basin.kmz
- 299-Laoyingzui(downstream).kmz
- 301-Lake Badswat-Debris flow channel.kmz
- 301-Lake Badswat-Debris flow gully basin.kmz
- 301-Lake Badswat.kmz
- 302-Lago Costantino-Debris flow channel.kmz
- 302-Lago Costantino-Debris flow gully basin.kmz
- 302-Lago Costantino.kmz
- 309-Kawarada river-Debris flow channel.kmz

- 309-Kawarada river-Debris flow gully basin.kmz
- 309-Kawarada river.kmz
- 310-Karli stream-Debris flow channel.kmz
- 310-Karli stream-Debris flow gully basin.kmz
- 310-Karli stream.kmz
- 311-Kanogawa · Okunoin-Debris flow channel.kmz
- 311-Kanogawa · Okunoin-Debris flow gully basin.kmz
- 311-Kanogawa · Okunoin.kmz
- 312-Kano River-Debris flow channel.kmz
- 312-Kano River-Debris flow gully basin.kmz
- 312-Kano River.kmz
- 314-Jinsha river-Debris flow channel.kmz
- 314-Jinsha river-Debris flow gully basin.kmz
- 314-Jinsha river.kmz
- 315-Jinsha river-Debris flow channel.kmz
- 315-Jinsha river-Debris flow gully basin.kmz
- 315-Jinsha river.kmz
- 319-Jiangjiagou (Xiao river)-Debris flow channel.kmz
- 319-Jiangjiagou (Xiao river)-Debris flow gully basin.kmz
- 319-Jiangjiagou (Xiao river).kmz
- 320-Jiangjiagou (Xiao river)-Debris flow channel.kmz
- 320-Jiangjiagou (Xiao river)-Debris flow gully basin.kmz
- 320-Jiangjiagou (Xiao river).kmz
- 321-Jiangjiagou (Xiao river)-Debris flow channel.kmz
- 321-Jiangjiagou (Xiao river)-Debris flow gully basin.kmz
- 321-Jiangjiagou (Xiao river).kmz
- 322-Jiangjiagou (Xiao river)-Debris flow channel.kmz
- 322-Jiangjiagou (Xiao river)-Debris flow gully basin.kmz
- 322-Jiangjiagou (Xiao river).kmz
- 323-Jiangjiagou (Xiao river)-Debris flow channel.kmz
- 323-Jiangjiagou (Xiao river)-Debris flow gully basin.kmz
- 323-Jiangjiagou (Xiao river).kmz
- 324-Jiangjiagou (Xiao river)-Debris flow channel.kmz

- 324-Jiangjiagou (Xiao river)-Debris flow gully basin.kmz
- 324-Jiangjiagou (Xiao river).kmz
- 325-Jiangjiagou-Debris flow channel.kmz
- 325-Jiangjiagou-Debris flow gully basin.kmz
- 325-Jiangjiagou.kmz
- 326-Jiangjiagou-Debris flow channel.kmz
- 326-Jiangjiagou-Debris flow gully basin.kmz
- 326-Jiangjiagou.kmz
- 327-Jiangjiagou-Debris flow channel.kmz
- 327-Jiangjiagou-Debris flow gully basin.kmz
- 327-Jiangjiagou.kmz
- 328-jiala(yaluzangbujiang)-Debris flow channel.kmz
- 328-jiala(yaluzangbujiang)-Debris flow gully basin.kmz
- 328-jiala(yaluzangbujiang).kmz
- 329-jiala#2(yaluzangbujiang)-Debris flow channel.kmz
- 329-jiala#2(yaluzangbujiang)-Debris flow gully basin.kmz
- 329-jiala#2(yaluzangbujiang).kmz
- 33-Yimen mine-Debris flow channel.kmz
- 33-Yimen mine-Debris flow gully basin.kmz
- 33-Yimen mine.kmz
- 332-Isarco River-Debris flow channel.kmz
- 332-Isarco River-Debris flow gully basin.kmz
- 332-Isarco River.kmz
- 333-Isarco River-Debris flow channel.kmz
- 333-Isarco River-Debris flow gully basin.kmz
- 333-Isarco River.kmz
- 347-Hualian-Debris flow channel.kmz
- 347-Hualian-Debris flow gully basin.kmz
- 347-Hualian.kmz
- 348-Hualian-Debris flow channel.kmz
- 348-Hualian-Debris flow gully basin.kmz
- 348-Hualian.kmz
- 349-Hualian-Debris flow channel.kmz



- 349-Hualian-Debris flow gully basin.kmz
- 349-Hualian.kmz
- 350-Hualian-Debris flow channel.kmz
- 350-Hualian-Debris flow gully basin.kmz
- 350-Hualian.kmz
- 351-Hualian-Debris flow channel.kmz
- 351-Hualian-Debris flow gully basin.kmz
- 351-Hualian.kmz
- 353-hongshuigou-Debris flow channel.kmz
- 353-hongshuigou-Debris flow gully basin.kmz
- 354-hongshancun-Debris flow channel.kmz
- 354-hongshancun-Debris flow gully basin.kmz
- 354-hongshancun-.kmz
- 355-Hongchungou-Debris flow channel.kmz
- 355-Hongchungou-Debris flow gully basin.kmz
- 356-Hongchungou-Debris flow channel.kmz
- 356-Hongchungou-Debris flow gully basin.kmz
- 357-Homathko River-Debris flow channel.kmz
- 357-Homathko River-Debris flow gully basin.kmz
- 358-Hiramaru River-Debris flow channel.kmz
- 358-Hiramaru River-Debris flow gully basin.kmz
- 359-Hiramaru River-Debris flow channel.kmz
- 359-Hiramaru River-Debris flow gully basin.kmz
- 36-Yellow River-Debris flow channel.kmz
- 36-Yellow River-Debris flow gully basin.kmz
- 36-Yellow River.kmz
- 360-Himekawa · Hiedayama-Debris flow channel.kmz
- 360-Himekawa · Hiedayama-Debris flow gully basin.kmz
- 361-Hime River · Ōshō River · Akabura Mountain-Debris flow channel.kmz
- 361-Hime River · Ōshō River · Akabura Mountain-Debris flow gully basin.kmz
- 362-Hime River-Debris flow channel.kmz
- 362-Hime River-Debris flow gully basin.kmz
- 363-Hime River (Hieda yamakuzurere)-Debris flow channel.kmz

- 363-Hime River (Hieda yamakuzurere)-Debris flow gully basin.kmz
- 363-Hime River (Hieda yamakuzurere).kmz
- 365-Heishigou-Debris flow channel.kmz
- 365-Heishigou-Debris flow gully basin.kmz
- 365-Heishigou.kmz
- 366-Heishigou-Debris flow channel.kmz
- 366-Heishigou-Debris flow gully basin.kmz
- 366-Heishigou.kmz
- 367-Heishigou-Debris flow channel.kmz
- 367-Heishigou-Debris flow gully basin.kmz
- 367-Heishigou.kmz
- 368-Haya River-Debris flow channel.kmz
- 368-Haya River-Debris flow gully basin.kmz
- 368-Haya River.kmz
- 369-Hanyuan-Debris flow channel.kmz
- 369-Hanyuan-Debris flow gully basin.kmz
- 369-Hanyuan.kmz
- 37-Yanzigou-Debris flow channel.kmz
- 37-Yanzigou-Debris flow gully basin.kmz
- 37-Yanzigou.kmz
- 370-Handlovka River-Debris flow channel.kmz
- 370-Handlovka River-Debris flow gully basin.kmz
- 370-Handlovka River.kmz
- 372-Guxianggou-Debris flow channel.kmz
- 372-Guxianggou-Debris flow gully basin.kmz
- 372-Guxianggou.kmz
- 373-Guxianggou-Debris flow channel.kmz
- 373-Guxianggou-Debris flow gully basin.kmz
- 373-Guxianggou.kmz
- 374-Guxianggou-Debris flow channel.kmz
- 374-Guxianggou-Debris flow gully basin.kmz
- 374-Guxianggou.kmz
- 375-Guxianggou-Debris flow channel.kmz

- 375-Guxianggou-Debris flow gully basin.kmz
- 375-Guxianggou.kmz
- 376-Guxianggou-Debris flow channel.kmz
- 376-Guxianggou-Debris flow gully basin.kmz
- 376-Guxianggou.kmz
- 377-Guxianggou-Debris flow channel.kmz
- 377-Guxianggou-Debris flow gully basin.kmz
- 377-Guxianggou.kmz
- 378-Guxianggou-Debris flow channel.kmz
- 378-Guxianggou-Debris flow gully basin.kmz
- 378-Guxianggou.kmz
- 379-Guxianggou-Debris flow channel.kmz
- 379-Guxianggou-Debris flow gully basin.kmz
- 379-Guxianggou.kmz
- 380-Guxianggou-Debris flow channel.kmz
- 380-Guxianggou-Debris flow gully basin.kmz
- 380-Guxianggou.kmz
- 381-Guxianggou-Debris flow channel.kmz
- 381-Guxianggou-Debris flow gully basin.kmz
- 381-Guxianggou.kmz
- 382-Guxianggou-Debris flow channel.kmz
- 382-Guxianggou-Debris flow gully basin.kmz
- 382-Guxianggou.kmz
- 383-Guxianggou-Debris flow channel.kmz
- 383-Guxianggou-Debris flow gully basin.kmz
- 383-Guxianggou.kmz
- 384-Guolanggou-Debris flow channel.kmz
- 384-Guolanggou-Debris flow gully basin.kmz
- 384-Guolanggou.kmz
- 385-Guapingcun-Debris flow channel.kmz
- 385-Guapingcun-Debris flow gully basin.kmz
- 385-Guapingcun.kmz
- 386-Guanyingqiao-Debris flow channel.kmz

- 386-Guanyingqiao-Debris flow gully basin.kmz
- 386-Guanyingqiao.kmz
- 387-Guanyingou-Debris flow channel.kmz
- 387-Guanyingou-Debris flow gully basin.kmz
- 387-Guanyingou.kmz
- 388-Guanshangou-Debris flow channel.kmz
- 388-Guanshangou-Debris flow gully basin.kmz
- 388-Guanshangou.kmz
- 389-Guanshangou-Debris flow channel.kmz
- 389-Guanshangou-Debris flow gully basin.kmz
- 389-Guanshangou.kmz
- 390-Guanshangou-Debris flow channel.kmz
- 390-Guanshangou-Debris flow gully basin.kmz
- 390-Guanshangou.kmz
- 391-Guanshangou-Debris flow channel.kmz
- 391-Guanshangou-Debris flow gully basin.kmz
- 391-Guanshangou.kmz
- 392-Guanshangou-Debris flow channel.kmz
- 392-Guanshangou-Debris flow gully basin.kmz
- 392-Guanshangou.kmz
- 393-Guanshangou-Debris flow channel.kmz
- 393-Guanshangou-Debris flow gully basin.kmz
- 393-Guanshangou.kmz
- 396-Grouse Creek-Debris flow channel.kmz
- 396-Grouse Creek-Debris flow gully basin.kmz
- 396-Grouse Creek.kmz
- 397-Grouse Creek-Debris flow channel.kmz
- 397-Grouse Creek-Debris flow gully basin.kmz
- 397-Grouse Creek.kmz
- 398-Gros Ventre River-Debris flow gully basin.kmz
- 398-Gros Ventre River.kmz
- 399-Gros Ventre River-Debris flow channel.kmz
- 399-Gros Ventre River-Debris flow gully basin.kmz

- 399-Gros Ventre River.kmz
- 4-Ziller River-Debris flow channel.kmz
- 4-Ziller River-Debris flow gully basin.kmz
- 4-Ziller River.kmz
- 400-Groppallo-Debris flow channel.kmz
- 400-Groppallo-Debris flow gully basin.kmz
- 400-Groppallo.kmz
- 401-Gonghe-Debris flow channel.kmz
- 401-Gonghe-Debris flow gully basin.kmz
- 401-Gonghe.kmz
- 402-Gongbujiangda-Debris flow channel.kmz
- 402-Gongbujiangda-Debris flow gully basin.kmz
- 403-Gohna Tal-Debris flow channel.kmz
- 403-Gohna Tal-Debris flow gully basin.kmz
- 403-Gohna Tal.kmz
- 404-Ginseng Hollow creek-Debris flow channel.kmz
- 404-Ginseng Hollow creek-Debris flow gully basin.kmz
- 404-Ginseng Hollow creek.kmz
- 405-Gilgit River-Debris flow channel.kmz
- 405-Gilgit River-Debris flow gully basin.kmz
- 405-Gilgit River.kmz
- 406-Gilgit River-Debris flow channel.kmz
- 406-Gilgit River-Debris flow gully basin.kmz
- 406-Gilgit River.kmz
- 407-Ghizar River-Debris flow channel.kmz
- 407-Ghizar River-Debris flow gully basin.kmz
- 407-Ghizar River.kmz
- 408-Garfield Creek-Debris flow gully basin.kmz
- 408-Garfield Creek.kmz
- 409-Gaoxiong-Debris flow channel.kmz
- 409-Gaoxiong-Debris flow gully basin.kmz
- 409-Gaoxiong.kmz
- 41-Yakedake · Taisho Pond-Debris flow channel.kmz

- 41-Yakedake · Taisho Pond-Debris flow gully basin.kmz
- 41-Yakedake · Taisho Pond.kmz
- 410-Gaoxiong-Debris flow channel.kmz
- 410-Gaoxiong-Debris flow gully basin.kmz
- 410-Gaoxiong.kmz
- 411-Gaoxiong-Debris flow channel.kmz
- 411-Gaoxiong-Debris flow gully basin.kmz
- 411-Gaoxiong.kmz
- 412-Gaoxiong-Debris flow channel.kmz
- 412-Gaoxiong-Debris flow gully basin.kmz
- 412-Gaoxiong.kmz
- 413-Gaoxiong-Debris flow channel.kmz
- 413-Gaoxiong-Debris flow gully basin.kmz
- 413-Gaoxiong.kmz
- 414-Gaoxiong-Debris flow channel.kmz
- 414-Gaoxiong-Debris flow gully basin.kmz
- 414-Gaoxiong.kmz
- 415-Gaoxiong-Debris flow channel.kmz
- 415-Gaoxiong-Debris flow gully basin.kmz
- 415-Gaoxiong.kmz
- 416-Gaoxiong-Debris flow channel.kmz
- 416-Gaoxiong-Debris flow gully basin.kmz
- 416-Gaoxiong.kmz
- 417-Gaojiagou-Debris flow channel.kmz
- 417-Gaojiagou-Debris flow gully basin.kmz
- 417-Gaojiagou.kmz
- 418-Gaojiagou-Debris flow channel.kmz
- 418-Gaojiagou-Debris flow gully basin.kmz
- 418-Gaojiagou.kmz
- 419-Gaojiagou-Debris flow channel.kmz
- 419-Gaojiagou-Debris flow gully basin.kmz
- 419-Gaojiagou.kmz
- 42-Yakedake · Taisho Pond-Debris flow channel.kmz

- 42-Yakedake · Taisho Pond-Debris flow gully basin.kmz
- 42-Yakedake · Taisho Pond.kmz
- 420-Gaojiagou-Debris flow channel.kmz
- 420-Gaojiagou-Debris flow gully basin.kmz
- 420-Gaojiagou.kmz
- 421-Ganxigou-Debris flow channel.kmz
- 421-Ganxigou-Debris flow gully basin.kmz
- 421-Ganxigou.kmz
- 422-Ganjiagou-Debris flow channel.kmz
- 422-Ganjiagou-Debris flow gully basin.kmz
- 422-Ganjiagou.kmz
- 423-Ganjiagou-Debris flow channel.kmz
- 423-Ganjiagou-Debris flow gully basin.kmz
- 423-Ganjiagou.kmz
- 424-Ganjiagou-Debris flow channel.kmz
- 424-Ganjiagou-Debris flow gully basin.kmz
- 424-Ganjiagou.kmz
- 425-Ganjiagou-Debris flow channel.kmz
- 425-Ganjiagou-Debris flow gully basin.kmz
- 425-Ganjiagou.kmz
- 426-Ganjiagou-Debris flow channel.kmz
- 426-Ganjiagou-Debris flow gully basin.kmz
- 426-Ganjiagou.kmz
- 427-Gangou(Jiuzhaigou county)-Debris flow channel.kmz
- 427-Gangou(Jiuzhaigou county)-Debris flow gully basin.kmz
- 427-Gangou(Jiuzhaigou county).kmz
- 430-Gader Torrent-Debris flow channel.kmz
- 430-Gader Torrent-Debris flow gully basin.kmz
- 430-Gader Torrent.kmz
- 431-Fraser River-Debris flow channel.kmz
- 431-Fraser River-Debris flow gully basin.kmz
- 431-Fraser River.kmz
- 432-Fondo Barone-Debris flow channel.kmz

- 432-Fondo Barone-liuyu.kmz
- 432-Fondo Barone.kmz
- 433-Flag Mountain Pass (Naka Natsugu)-Debris flow channel.kmz
- 433-Flag Mountain Pass (Naka Natsugu)-Debris flow gully basin.kmz
- 433-Flag Mountain Pass (Naka Natsugu).kmz
- 434-Fengmingqiao-Debris flow channel.kmz
- 434-Fengmingqiao-Debris flow gully basin.kmz
- 434-Fengmingqiao.kmz
- 435-Erpu-Debris flow channel.kmz
- 435-Erpu-Debris flow gully basin.kmz
- 435-Erpu.kmz
- 437-Ergou-Debris flow channel.kmz
- 437-Ergou-Debris flow gully basin.kmz
- 437-Ergou.kmz
- 438-East Fork Hood River-Debris flow channel.kmz
- 438-East Fork Hood River-Debris flow gully basin.kmz
- 438-East Fork Hood River.kmz
- 439-Dusty Creek-Debris flow channel.kmz
- 439-Dusty Creek-Debris flow gully basin.kmz
- 439-Dusty Creek.kmz
- 440-Dujiangyan-Debris flow channel.kmz
- 440-Dujiangyan-Debris flow gully basin.kmz
- 440-Dujiangyan.kmz
- 441-Dragon Canyon-Debris flow channel.kmz
- 441-Dragon Canyon-Debris flow gully basin.kmz
- 441-Dragon Canyon.kmz
- 442-Douyaping-Debris flow channel.kmz
- 442-Douyaping-Debris flow gully basin.kmz
- 442-Douyaping.kmz
- 443-Dongyuguyima-Debris flow channel.kmz
- 443-Dongyuguyima-Debris flow gully basin.kmz
- 443-Dongyuguyima.kmz
- 444-Dongyuguyima-Debris flow channel.kmz



- 444-Dongyuguyima-Debris flow gully basin.kmz
- 444-Dongyuguyima.kmz
- 445-Dongshizhen-Debris flow channel.kmz
- 445-Dongshizhen-Debris flow gully basin.kmz
- 445-Dongshizhen.kmz
- 450-Dharbang-Debris flow channel.kmz
- 450-Dharbang-Debris flow gully basin.kmz
- 450-Dharbang.kmz
- 451-Dharbang-Debris flow channel.kmz
- 451-Dharbang-Debris flow gully basin.kmz
- 454-Dejiang-Debris flow channel.kmz
- 454-Dejiang-Debris flow gully basin.kmz
- 454-Dejiang.kmz
- 455-Dead Horse Creek-Debris flow channel.kmz
- 455-Dead Horse Creek-Debris flow gully basin.kmz
- 455-Dead Horse Creek.kmz
- 461-Daliriver-Debris flow channel.kmz
- 461-Daliriver-Debris flow gully basin.kmz
- 461-Daliriver.kmz
- 462-Daliriver-Debris flow channel.kmz
- 462-Daliriver-Debris flow gully basin.kmz
- 465-Dadu River-Debris flow channel.kmz
- 465-Dadu River-Debris flow gully basin.kmz
- 466-Dadu River-Debris flow channel.kmz
- 466-Dadu River-Debris flow gully basin.kmz
- 466-Dadu River.kmz
- 467-Dadu River-Debris flow channel.kmz
- 467-Dadu River-Debris flow gully basin.kmz
- 467-Dadu River.kmz
- 475-Cowlitz River-Debris flow channel.kmz
- 475-Cowlitz River-Debris flow gully basin.kmz
- 475-Cowlitz River.kmz
- 476-Cottonwood Creek-Debris flow channel.kmz

- 476-Cottonwood Creek-Debris flow gully basin.kmz
- 476-Cottonwood Creek.kmz
- 477-Contr. Schiavone-Debris flow channel.kmz
- 477-Contr. Schiavone-Debris flow gully basin.kmz
- 477-Contr. Schiavone.kmz
- 478-Contr. Rocca Fisauli-Debris flow channel.kmz
- 478-Contr. Rocca Fisauli-Debris flow gully basin.kmz
- 478-Contr. Rocca Fisauli.kmz
- 479-Colorado River-Debris flow channel.kmz
- 479-Colorado River-Debris flow gully basin.kmz
- 479-Colorado River.kmz
- 48-Xingwenpinggou-Debris flow channel.kmz
- 48-Xingwenpinggou-Debris flow gully basin.kmz
- 48-Xingwenpinggou.kmz
- 480-Colorado River-Debris flow channel.kmz
- 480-Colorado River-Debris flow gully basin.kmz
- 480-Colorado River.kmz
- 481-Colma di Barbiano-Debris flow channel.kmz
- 481-Colma di Barbiano-Debris flow gully basin.kmz
- 481-Colma di Barbiano.kmz
- 482-Codera stream-Debris flow channel.kmz
- 482-Codera stream-Debris flow gully basin.kmz
- 482-Codera stream.kmz
- 483-Coca River-Debris flow channel.kmz
- 483-Coca River-Debris flow gully basin.kmz
- 483-Coca River.kmz
- 489-Chiusa-Debris flow channel.kmz
- 489-Chiusa-Debris flow gully basin.kmz
- 489-Chiusa.kmz
- 490-ChiShan Creek(Namasia District)-Debris flow channel.kmz
- 490-ChiShan Creek(Namasia District)-Debris flow gully basin.kmz
- 490-ChiShan Creek(Namasia District).kmz
- 491-Chianiello-Debris flow channel.kmz

- 491-Chianiello-Debris flow gully basin.kmz
- 491-Chianiello.kmz
- 496-Cheakamus River-Debris flow channel.kmz
- 496-Cheakamus River-Debris flow gully basin.kmz
- 496-Cheakamus River.kmz
- 498-Chakachatna river-Debris flow channel.kmz
- 498-Chakachatna river-Debris flow gully basin.kmz
- 498-Chakachatna river.kmz
- 499-Castelfranci-Debris flow channel.kmz
- 499-Castelfranci-Debris flow gully basin.kmz
- 499-Castelfranci.kmz
- 500-Castagnod' Andrea-Debris flow channel.kmz
- 500-Castagnod' Andrea-Debris flow gully basin.kmz
- 500-Castagnod' Andrea.kmz
- 501-Cascade Creek-Debris flow channel.kmz
- 501-Cascade Creek-Debris flow gully basin.kmz
- 501-Cascade Creek.kmz
- 503-Campo Tures-Debris flow channel.kmz
- 503-Campo Tures-Debris flow gully basin.kmz
- 503-Campo Tures.kmz
- 504-Cache Creek-Debris flow channel.kmz
- 504-Cache Creek-Debris flow gully basin.kmz
- 504-Cache Creek.kmz
- 505-Buthier Torrent-Debris flow channel.kmz
- 505-Buthier Torrent-Debris flow gully basin.kmz
- 505-Buthier Torrent.kmz
- 506-Buller River-Debris flow channel.kmz
- 506-Buller River-Debris flow gully basin.kmz
- 506-Buller River.kmz
- 507-Bued River-Debris flow channel.kmz
- 507-Bued River-Debris flow gully basin.kmz
- 507-Bued River.kmz
- 508-Brixen Torrent-Debris flow channel.kmz

- 508-Brixen Torrent-Debris flow gully basin.kmz
- 508-Brixen Torrent.kmz
- 509-Brevon Torrent-Debris flow channel.kmz
- 509-Brevon Torrent-Debris flow gully basin.kmz
- 509-Brevon Torrent.kmz
- 510-Brenno River-Debris flow channel.kmz
- 510-Brenno River-Debris flow gully basin.kmz
- 510-Brenno River.kmz
- 512-Boqu River-Debris flow channel.kmz
- 512-Boqu River-Debris flow gully basin.kmz
- 512-Boqu River.kmz
- 514-Birse River(upper dam)-Debris flow channel.kmz
- 514-Birse River(upper dam)-Debris flow gully basin.kmz
- 514-Birse River(upper dam).kmz
- 515-Birse River-Debris flow channel.kmz
- 515-Birse River-Debris flow gully basin.kmz
- 515-Birse River.kmz
- 517-Bhairab Kunda Stream-Debris flow channel.kmz
- 517-Bhairab Kunda Stream-Debris flow gully basin.kmz
- 517-Bhairab Kunda Stream.kmz
- 518-Bhagirathi River-Debris flow channel.kmz
- 518-Bhagirathi River-Debris flow gully basin.kmz
- 518-Bhagirathi River.kmz
- 519-Benedello-Debris flow channel.kmz
- 519-Benedello-Debris flow gully basin.kmz
- 519-Benedello.kmz
- 529-Basu county-Debris flow channel.kmz
- 529-Basu county-Debris flow gully basin.kmz
- 529-Basu county.kmz
- 53-xichang-Debris flow channel.kmz
- 53-xichang-Debris flow gully basin.kmz
- 53-xichang.kmz
- 530-Bardea-Debris flow channel.kmz

- 530-Bardea-Debris flow gully basin.kmz
- 530-Bardea.kmz
- 534-Banan-Debris flow channel.kmz
- 534-Banan-Debris flow gully basin.kmz
- 534-Banan.kmz
- 54-Xichang-Debris flow channel.kmz
- 54-Xichang-Debris flow gully basin.kmz
- 54-Xichang.kmz
- 545-Azusa River-Debris flow channel.kmz
- 545-Azusa River-Debris flow gully basin.kmz
- 545-Azusa River.kmz
- 546-Azusa River-Debris flow channel.kmz
- 546-Azusa River-Debris flow gully basin.kmz
- 546-Azusa River.kmz
- 547-Aurina Torrent-Debris flow channel.kmz
- 547-Aurina Torrent-Debris flow gully basin.kmz
- 547-Aurina Torrent.kmz
- 548-Arita-gawa · Kongobuji · Ko -Debris flow channel.kmz
- 548-Arita-gawa · Kongobuji · Ko -Debris flow gully basin.kmz
- 548-Arita-gawa · Kongobuji · Ko .kmz
- 549-Anterselva-Debris flow channel.kmz
- 549-Anterselva-Debris flow gully basin.kmz
- 549-Anterselva.kmz
- 551-Alaknanda River-Debris flow channel.kmz
- 551-Alaknanda River-Debris flow gully basin.kmz
- 551-Alaknanda River.kmz
- 62-Wuding-Debris flow channel.kmz
- 62-Wuding-Debris flow gully basin.kmz
- 62-Wuding.kmz
- 63-Wilson River-Debris flow channel.kmz
- 63-Wilson River-Debris flow gully basin.kmz
- 63-Wilson River.kmz
- 70-Wenchuan-Debris flow channel.kmz

- 70-Wenchuan-Debris flow gully basin.kmz
- 70-Wenchuan.kmz
- 75-Wanzhou-Debris flow channel.kmz
- 75-Wanzhou-Debris flow gully basin.kmz
- 75-Wanzhou.kmz
- 8-Zhouqu-Debris flow channel.kmz
- 8-Zhouqu-Debris flow gully basin.kmz
- 8-Zhouqu.kmz
- 82-Vanoi Torrent-Debris flow channel.kmz
- 82-Vanoi Torrent-Debris flow gully basin.kmz
- 82-Vanoi Torrent.kmz
- 83-Vanoi Torrent-Debris flow channel.kmz
- 83-Vanoi Torrent-Debris flow gully basin.kmz
- 83-Vanoi Torrent.kmz
- 87-Turbid Creek-Debris flow channel.kmz
- 87-Turbid Creek-Debris flow gully basin.kmz
- 87-Turbid Creek.kmz
- 88-Tsao-Ling Lake-Debris flow channel.kmz
- 88-Tsao-Ling Lake-Debris flow gully basin.kmz
- 88-Tsao-Ling Lake.kmz
- 89-Tsao-Ling Lake-Debris flow channel.kmz
- 89-Tsao-Ling Lake-Debris flow gully basin.kmz
- 89-Tsao-Ling Lake.kmz
- 9-Zhouqu-Debris flow channel.kmz
- 9-Zhouqu-Debris flow gully basin.kmz
- 9-Zhouqu.kmz

The copyright of individual parts of the supplement might differ from the article licence.
